# Supplementary material
Source: PubMed Central journal article supplement (PMC2770370)
Supplement: 97320630004046S1.pdf [file 97320630004046S1.pdf]

**Supplementary material****Table 1:** Prediction performance of GSTaxClassifier for the test data sets from bacteria, archaea, and eukaryotes

| Taxonomic rank |         | Bacteria<br>(n = 1,000) |          | Archaea<br>(n = 1,000) |          | Eukaryota<br>(n = 1,000) |          |
|----------------|---------|-------------------------|----------|------------------------|----------|--------------------------|----------|
|                |         | 400 bp                  | 1,000 bp | 400 bp                 | 1,000 bp | 400 bp                   | 1,000 bp |
| Accuracy (%)   | Kingdom | 92.5                    | 95.3     | 91.5                   | 96.4     | 73.6                     | 76.5     |
|                | Phylum  | 77.8                    | 78.0     | 70.4                   | 76.2     | 61.2                     | 75.9     |
|                | Order   | 63.2                    | 67.4     | 60.9                   | 71.9     | 54.3                     | 57.8     |
